# Supplementary material
Source: ML conference proceedings conference paper supplement (https://proceedings.mlr.press/v119/bellec20a.html)
Supplement: Supplementary file 1 [file bellec20a-supp.pdf]

## Supplement

### A. Upper bound for the supremum of Gaussian processes

*Proof of Lemma 5.3.* By the Gaussian concentration theorem (Boucheron et al., 2013, Theorem 5.8), with probability at least  $1 - e^{-x}$  we have

$$\sup_{B \in T^*} G_B \leq \mathbb{E} \sup_{B \in T^*} G_B + \sigma \sqrt{2x} \sup_{B \in T^*} \|[2I_{n \times n} - (B - \bar{A})](B - \bar{A})\mu\|. \quad (\text{A.1})$$

$$\leq C_{16} \gamma_2(T^*, d_G) + \sigma \sqrt{2x} \sup_{B \in T^*} 3\|(B - \bar{A})\mu\| \quad (\text{A.2})$$

where for the second inequality we used Talagrand's majorizing measure theorem (cf., e.g., (Vershynin, 2018, Section 8.6)) and the fact that  $B, \bar{A}$  have operator norm at most one, where  $d_G$  is the canonical metric of the Gaussian process,

$$d_G(A, B)^2 = \mathbb{E}[(G_A - G_B)^2].$$

If  $D = B - A$  is the difference and  $P$  commutes with  $A$  and  $B$ ,

$$G_B - G_A = \epsilon^T [2D\mu - \frac{1}{2}(A + B - 2\bar{A})D\mu - \frac{1}{2}D(A + B - 2P)\mu] + \epsilon^T D(\bar{A} - P)\mu.$$

By the triangle inequality and using that  $A, B, P, \bar{A}$  have operator norm at most one,  $d_G(A, B) \leq 6\sigma\|D\mu\| + \sigma\|D(\bar{A} - P)\mu\|$ . This shows that

$$\gamma_2(T^*, d_G) \leq 6\sigma\gamma_2(T^*, d_1) + \sigma\gamma_2(T^*, d_2)$$

where  $d_1(A, B) = \|(B - A)\mu\|$  and  $d_2(A, B) = \|(A - B)(\bar{A} - P)\mu\|$ . By Lemma 5.2,  $\gamma_2(T^*, d_1) \leq C_{17}\Delta(T^*, d_1)$  and similarly for  $d_2$  (note that  $d_2$  is similar to  $d_1$  with  $\mu$  replaced by  $\mu' = (P - \bar{A})\mu$ ).

If  $\sup_{B \in T^*} d(B, \bar{A}) \leq \delta^*$  for the metric  $d$  in (5.1), then  $\sup_{B \in T^*} \|(B - \bar{A})\mu\| \leq \delta^*$  and  $\Delta(T^*, d_1) \leq 2\delta^*$ . Furthermore if  $P$  is the convex projection of  $\bar{A}$  onto the convex hull of  $T^*$  with respect to the Hilbert metric  $d$  in (5.1), then

$$\begin{aligned} \Delta(T^*, d_2) &= \sup_{B, B' \in T^*} d_2(B, B') \leq 2\|(P - \bar{A})\mu\| \\ &\leq 2d(P, \bar{A}) \leq 2d(B_0, \bar{A}) \leq 2\delta^* \end{aligned}$$

for any  $B_0 \in T^*$  where we used that by definition of the convex projection,  $d(P, \bar{A}) \leq d(B_0, \bar{A})$ .  $\square$

### B. Upper bound for the supremum of Quadratic processes

The following inequality, known as the Hanson-Wright inequality, will be useful for the next Lemma. If  $\varepsilon \sim N(0, \sigma^2 I_{n \times n})$  is standard normal, then

$$\mathbb{P}\left[|\varepsilon^T Q \varepsilon - \sigma^2 \text{trace } Q| > 2\sigma^2(\|Q\|_F \sqrt{x} + \|Q\|_{op} x)\right] \leq 2e^{-x}, \quad (\text{B.1})$$

for any square matrix  $Q \in \mathbb{R}^{n \times n}$ . We refer to (Boucheron et al., 2013, Example 2.12) for a proof for normally distributed  $\varepsilon$  and (Rudelson & Vershynin, 2013; Hsu et al., 2012; Bellec, 2014; Adamczak, 2015) for proofs of (B.1) in the sub-gaussian case.

*Proof of Lemma 5.4.* We apply Theorem 2.4 in (Adamczak, 2015) which implies that if  $W_B = \varepsilon^T Q_B \varepsilon - \text{trace}[Q_B]$  where  $\varepsilon \sim N(0, I_{n \times n})$  and  $Q_B$  is a symmetric matrix of size  $n \times n$  for every  $B$ , then

$$\begin{aligned} \mathbb{P}\left(\sup_{B \in T^*} W_B \leq \mathbb{E} \sup_{B \in T^*} W_B + C_{18} \sigma \sqrt{x} \sup_{B \in T^*} \mathbb{E}\|Q_B \varepsilon\| \right. \\ \left. + C_{19} x \sigma^2 \sup_{B \in T^*} \|Q_B\|_{op}\right) \geq 1 - 2e^{-x}. \end{aligned}$$

For the third term,  $Q_B = 2(B - \bar{A}) - (B - \bar{A})^2/2$  hence  $\|Q_B\|_{op} \leq 6$  because  $B, \bar{A}$  both have operator norm at most one. For the second term, since  $T^*$  is a family of ordered linear smoothers, there exists extremal matrices  $B_0, B_1 \in T^*$  such that  $B_0 \preceq B \preceq B_1$  for all  $B \in T^*$ ; we then have  $B - B_0 \preceq B_1 - B_0$  and

$$\begin{aligned} \|Q_B \varepsilon\| &\leq 3\|(B - \bar{A})\varepsilon\| \leq 3\|(B_1 - B_0)\varepsilon\| + 3\|(B_0 - \bar{A})\varepsilon\| \\ &\leq 3\|(B_1 - \bar{A})\varepsilon\| + 6\|(B_0 - \bar{A})\varepsilon\|. \end{aligned}$$

Hence  $\mathbb{E}\|Q_B \varepsilon\| \leq \mathbb{E}[\|Q_B \varepsilon\|^2]^{1/2} \leq 3\sigma\|B_1 - \bar{A}\|_F + 6\sigma\|B_0 - \bar{A}\|_F \leq 9\delta^*$ .

We finally apply a generic chaining upper bound to bound  $\mathbb{E} \sup_{B \in T^*} W_B$ . For any fixed  $B_0 \in T^*$  we have  $\mathbb{E}[W_{B_0}] = 0$  hence  $\mathbb{E} \sup_{B \in T^*} W_B = \mathbb{E} \sup_{B \in T^*} (W_B - W_{B_0})$ . For two matrices  $A, B \in T^*$  we have  $W_B - W_A = \varepsilon^T (Q_B - Q_A) \varepsilon - \text{trace}[Q_B - Q_A]$ , and

$$\varepsilon^T (Q_B - Q_A) \varepsilon = \varepsilon^T [(B - A)(2I_{n \times n} - \frac{1}{2}(A + B - 2\bar{A}))]\varepsilon,$$

hence by the Hanson-Wright inequality (B.1), with probability at least  $1 - 2e^{-x}$ ,

$$\begin{aligned} |W_B - W_A| &\leq 2\sigma^2 \|(B - A)(2I_{n \times n} - \frac{1}{2}(A + B - 2\bar{A}))\|_F (\sqrt{x} + x) \\ &\leq 8\sigma^2 \|A - B\|_F (x + \sqrt{x}). \end{aligned}$$

Hence by the generic chaining bound given in Theorem 3.5 in (Dirksen, 2015), we get that

$$\begin{aligned} \mathbb{E} \sup_{B \in T^*} |W_B - W_{B_0}| \\ \leq C_{20} \sigma^2 [\gamma_1(T^*, \|\cdot\|_F) + \gamma_2(T^*, \|\cdot\|_F) + \Delta(T^*, \|\cdot\|_F)]. \end{aligned}$$

605 For each  $\alpha = 1, 2$  we have  $\gamma_\alpha(T^*, \|\cdot\|_F) \leq C_{21}\Delta(T^*, \|\cdot\|_F)$   
606  $\|\cdot\|_F)$  by Lemma 5.2. Since  $\sigma\|B - \hat{A}\| \leq \delta^*$  for any  
607  $B \in T^*$ , we obtain  $\Delta(T^*, \|\cdot\|_F) \leq 2\delta^*/\sigma$ .  $\square$

### 609 C. Proof of Theorem 3.2

610 *Proof.* Consider  $\mu \in \mathbf{R}^n$  with norm  $\|\mu\|^2 = n(1-c/\sqrt{n})$   
611 for a numerical constant  $c > 0$  to be determined. Set  
612  $A_1 = 0$  and  $A_2 = I_n$ , assume  $\sigma^2 = 1$  for simplicity.  
613 The loss of  $A_1$  is  $\|\mu\|^2$  and the loss of  $A_2$  is  $\|\varepsilon\|^2$ .

614  $A_1$  has smaller MSE than  $A_2$  since  $\|\mu\|^2 < n$ . The  
615 regret for selecting based on  $C_p$  is thus  $I_{\Omega_2}(\|\varepsilon\|^2 -$   
616  $\|\mu\|^2)$  where  $I_{\Omega_2}$  is the indicator of the event  $C_p(A_2) <$   
617  $C_p(A_1)$ , this event is

$$618 \Omega_2 = \{C_p(A_2) = 2n < \|y\|^2 = C_p(A_2)\}.$$

619 Consider now for some absolute constants  $A, B$ , the  
620 events

$$621 \Omega_A = \{-1 \leq \varepsilon^T \mu / \|\mu\| \leq 0\}$$

622 and

$$623 \Omega_B = \{\|(I_n - \|\mu\|^{-2} \mu \mu^T) \varepsilon\|^2 - n \geq 3\sqrt{n}\}.$$

624 The first event  $\Omega_A$  involves the standard normal  
625  $\varepsilon^T \mu / \|\mu\|$  and the second event  $\Omega_B$  involves the random  
626 variable  $\|(I_n - \|\mu\|^{-2} \mu \mu^T) \varepsilon\|^2$  which has  $\chi^2$  distribution  
627 with  $n - 1$  degrees-of-freedom. The two random variables are  
628 independent by properties of  $\varepsilon \sim N(0, I_n)$  so that  $\Omega_A$  and  $\Omega_B$   
629 are independent and  $\mathbb{P}(\Omega_A \cap \Omega_B) = \mathbb{P}(\Omega_A)\mathbb{P}(\Omega_B) \geq C_{22} > 0$   
630 for some absolute constant.

631 Furthermore, on  $\Omega_A \cap \Omega_B$  we have

$$632 \|y\|^2 - 2n = \|\mu\|^2 + \|\varepsilon\|^2 + 2\varepsilon^T \mu - 2n$$

$$633 \geq -c\sqrt{n} + 3\sqrt{n} - 2\|\mu\|$$

$$634 \geq (-c + 1)\sqrt{n}$$

635 so that  $\Omega_A \cap \Omega_B \subset \Omega_2$  if, for instance, we choose  
636  $c = 1/2$ .

637 Since  $\|y\|^2 = \|\mu\|^2 + 2\varepsilon^T \mu + \|\varepsilon\|^2$ ,  $\Omega_2$  can be rewritten

$$638 \Omega_2 = \{2c\sqrt{n} - 2\varepsilon^T \mu = 2(n - \|\mu\|^2) - 2\varepsilon^T \mu < \|\varepsilon\|^2 - \|\mu\|^2\}.$$

639 Hence the regret is bounded from below on  $\Omega_A \cap \Omega_B$   
640 as

$$641 (\|A_k y - \mu\|^2 - \|A_1 y - \mu\|^2) = (\|\varepsilon\|^2 - \|\mu\|^2)$$

$$642 \geq (2c\sqrt{n} - 2\varepsilon^T \mu)$$

$$643 \geq 2c\sqrt{n} = \sqrt{n}.$$

644 Here,  $\sqrt{n} \asymp \|\mu\| = (R^*)^{1/2}$  up to an absolute multiplicative  
645 constant, so that the claim is proved.  $\square$

646
